# Supplementary material for: The Impact of SRT2104 on Skeletal Muscle Mitochondrial Function, Redox Biology, and Loss of Muscle Mass in Hindlimb Unloaded Rats
Source: MDPI journal article supplement (doi:10.3390/ijms241311135), 2023-07-06
Supplement: s1 [file s1]

## SUPPLEMENTAL FIGURES

# The Impact of SRT2104 on Skeletal Muscle Mitochondrial Function, Redox Biology, and Loss of Muscle Mass in Hindlimb Unloaded Rats

Lauren T. Wesolowski <sup>1</sup>, Jessica L. Simons <sup>1</sup>, Pier L. Semanchik <sup>1</sup>, Mariam A. Othman <sup>2</sup>, Joo-Hyun Kim <sup>2</sup>, John M. Lawler <sup>2,3</sup>, Khaled Y. Kamal <sup>2,\*</sup> and Sarah H. White-Springer <sup>1,\*</sup>

<sup>1</sup> Department of Animal Science, College of Agriculture and Life Science, Texas A&M University and Texas A&M AgriLife Research, College Station, TX 77843, USA; wesolowski@tamu.edu (L.T.W.); jls97@tamu.edu (J.L.S.); piersemanchik@tamu.edu (P.L.S.)

<sup>2</sup> Department of Kinesiology & Sport Management, School of Education and Human Development, Texas A&M University, College Station, TX 77843, USA; mariam.othman@tamu.edu (M.A.O.); dhwnghusdh@tamu.edu (J.H.K.); jml2621@tamu.edu (J.M.L.)

<sup>3</sup> Department of Nutrition, Texas A&M University, College Station, TX 77843, USA

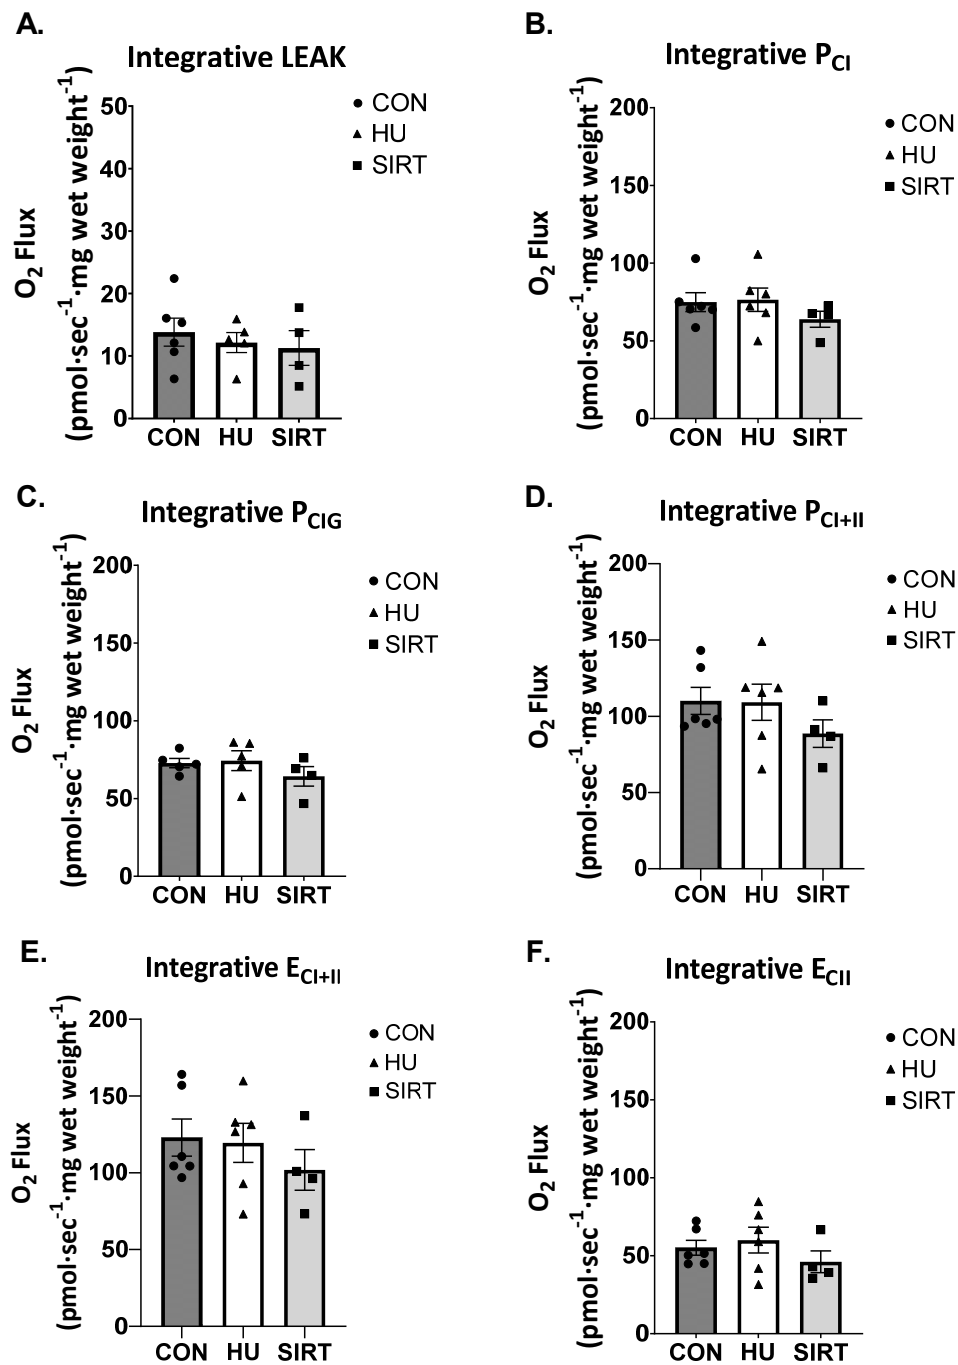

**Supplementary Figure S1. Effect of the Sirtuin-1 Agonist SRT2104 on integrative (relative to tissue wet weight) mitochondrial capacities as measured by high-resolution respirometry in the soleus muscle of hindlimb unloaded rats.** (A) Integrative proton LEAK, (B, C) oxidative phosphorylation supported by complex I (P<sub>CI</sub> and P<sub>CI+II</sub>), (D) maximal coupled oxidative phosphorylation (P<sub>CI+II</sub>), (E) maximal noncoupled electron transfer (E<sub>CI+II</sub>), and (F) electron transfer supported by complex II only (E<sub>CI</sub>) capacities in the gastrocnemius muscle of ambulatory control rats (CON; *n* = 6), rats hindlimb unloaded for 10 days (HU; *n* = 6), and rats hindlimb unloaded for 10 days while treated with SRT2104 (SIRT; *n* = 4). Values are means ± SEM.

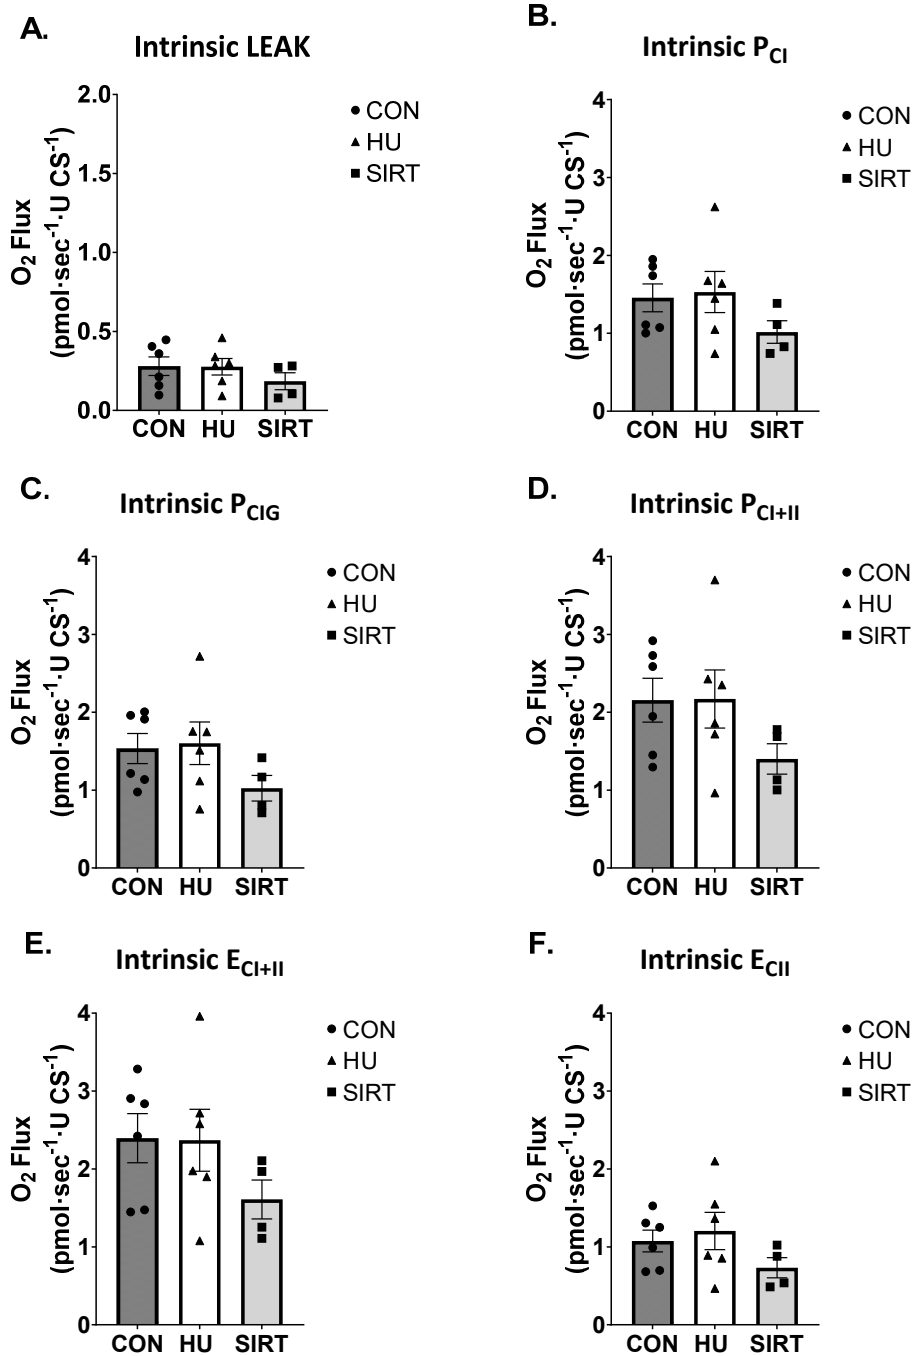

**Supplementary Figure S2. Effect of the Sirtuin-1 Agonist SRT2104 on intrinsic (relative to CS activity) mitochondrial capacities as measured by high-resolution respirometry in the soleus muscle of hindlimb unloaded rats.** (A) Intrinsic proton LEAK, (B, C) oxidative phosphorylation supported by complex I (P<sub>CI</sub> and P<sub>CI+II</sub>), (D) maximal coupled oxidative phosphorylation (P<sub>CI+II</sub>), (E) maximal noncoupled electron transfer (E<sub>CI+II</sub>), and (F) electron transfer supported by complex II only (E<sub>CII</sub>) capacities in the gastrocnemius muscle of ambulatory control rats (CON; *n* = 6), rats hindlimb unloaded for 10 days (HU; *n* = 6), and hindlimb unloaded for 10 days while treated with SRT2104 (SIRT; *n* = 4). Values are means ± SEM.

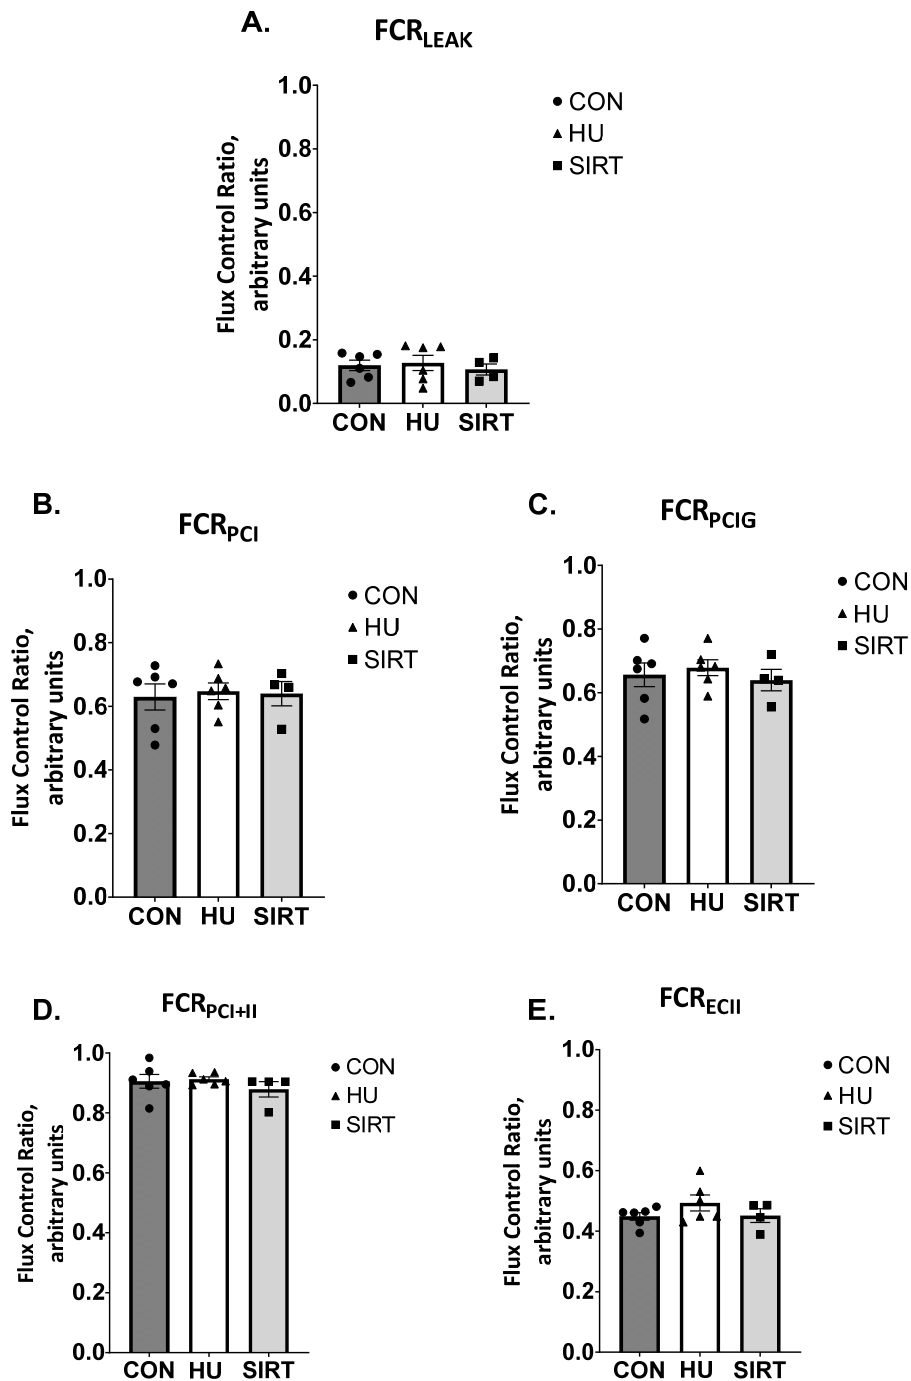

**Supplementary Figure S3. Effect of the Sirtuin-1 Agonist SRT2104 on mitochondrial flux control ratios in the soleus muscle of hindlimb unloaded rats.** (A) The ratio of LEAK to maximal electron transfer (flux control ratio;  $FCR_{LEAK}$ ), (B) FCR for oxidative phosphorylation supported by complex I ( $FCR_{PCI}$ ), (C) FCR when glutamate was added as an additional complex I substrate ( $FCR_{PCIG}$ ), (D) FCR for maximal coupled oxidative phosphorylation ( $FCR_{PCI+II}$ ) and (E) FCR for noncoupled electron transfer supported by complex II only ( $FCR_{ECII}$ ) of ambulatory control rats (CON;  $n = 6$ ), rats hindlimb unloaded for 10 days (HU;  $n = 6$ ), and rats hindlimb unloaded for 10 days while treated with SRT2104 (SIRT;  $n = 4$ ). Values are means  $\pm$  SEM.
